# Supplementary material for: Noninvasive Markers of Inflammation and Protein Loss Augment Diagnosis of Pediatric Celiac Disease
Source: PubMed Central journal article supplement — Clin Transl Gastroenterol. 2024 Mar 14;15(5):e00695. doi: 10.14309/ctg.0000000000000695 (PMC11124691; doi:10.14309/ctg.0000000000000695), 2024-03-14

**Supplemental Figure 1.** Comparison of fecal lipocalin-2 in biopsy confirmed vs biopsy negative patients and controls. P values from Mann-Whitney. (A) Fecal lipocalin-2 Marsh 3 compared to controls. (B) Fecal lipocalin-2 Marsh 3 compared to Marsh 0. Horizontal lines represent medians.

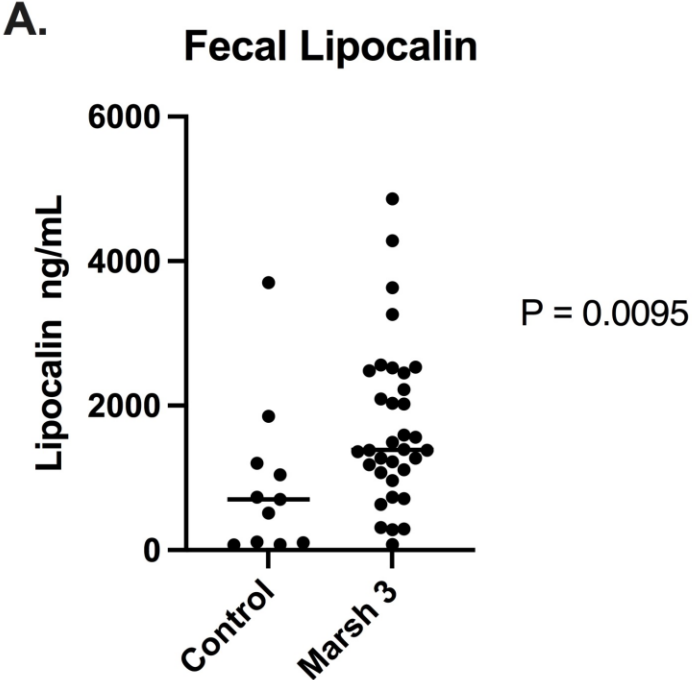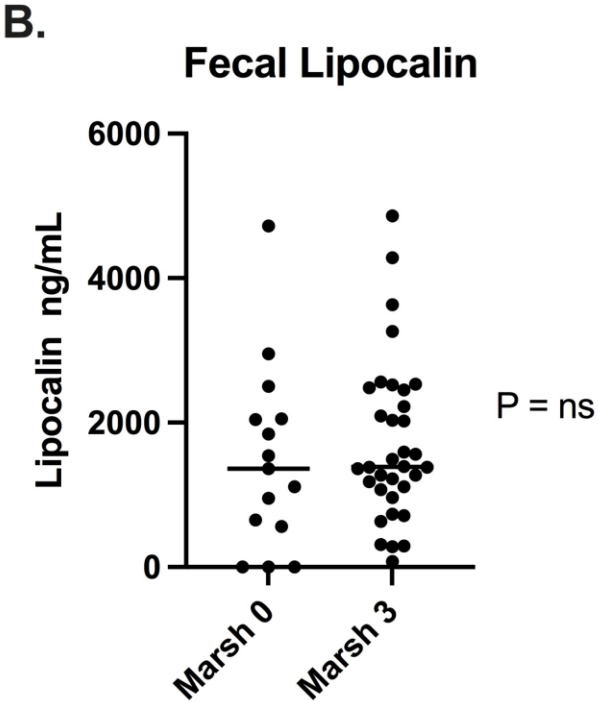

**Supplemental Figure 2.** Comparison of Fecal Calprotectin in biopsy confirmed vs biopsy negative patients and controls. P values from Mann-Whitney. (A) Fecal Calprotectin Marsh 3 compared to controls. (B) Fecal Calprotectin Marsh 3 compared to Marsh 0. Horizontal lines represent medians.

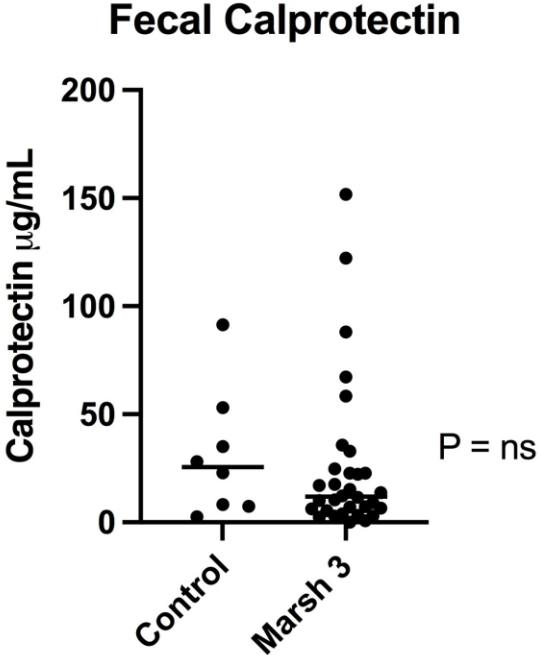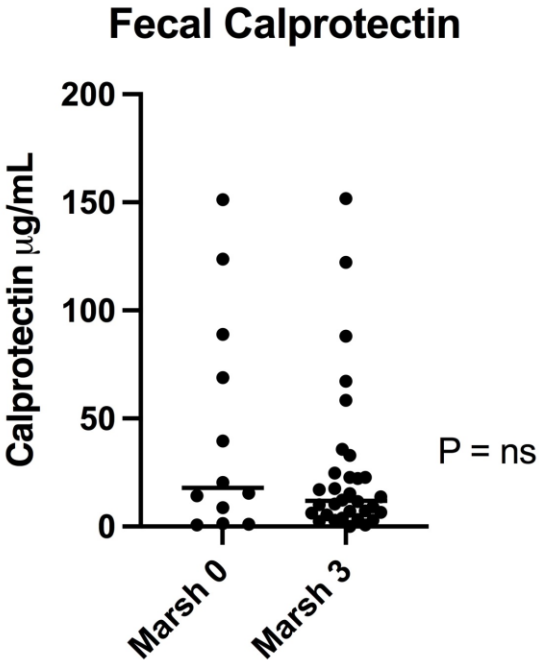

Supplement: ct9-15-e00695-s001.pdf [file ct9-15-e00695-s001.pdf]
